# Supplementary material for: Colloidal solutions of niobium trisulfide and niobium triselenide
Source: Royal Society of Chemistry journal article supplement (doi:10.1039/c4tc00459k), 2014-01-01
Supplement: c4tc00459k1.pdf [file c4tc00459k1.pdf]

# Electronic Supplementary Information for the manuscript submitted to Journal of Materials Chemistry C

## Colloidal solutions of niobium trisulfide and niobium triselenide

Vladimir E. Fedorov,<sup>\*a, b</sup> Sofya B. Artemkina,<sup>a, b</sup> Ekaterina D. Grayfer,<sup>a</sup> Nikolay G. Naumov,<sup>a, b</sup>  
Yuri V. Mironov,<sup>a</sup> Alexander I. Bulavchenko,<sup>a</sup> Vladimir I. Zaikovskii,<sup>b</sup> Irina V. Antonova,<sup>c</sup>  
Alexander I. Komonov,<sup>c</sup> and Maxim V. Medvedev<sup>d</sup>

<sup>a</sup>Nikolaev Institute of Inorganic Chemistry, Siberian Branch of Russian Academy of Sciences, 3, Acad.  
Lavrentiev prospect, Novosibirsk, 630090, Russian Federation

<sup>b</sup>Novosibirsk State University, 2, Pirogova street, Novosibirsk, 630090, Russian Federation

<sup>c</sup>Rzhanov Institute of Semiconductor Physics, Siberian Branch of Russian Academy of Sciences, 13,  
Acad. Lavrentiev prospect, Novosibirsk, 630090, Russian Federation

<sup>d</sup>Samsung Advanced Institute of Technology, Suwon, South Korea

\*Corresponding author. Tel. +7383-330-92-53; E-mail: [fed@niic.nsc.ru](mailto:fed@niic.nsc.ru)

## 1. Experimental details

The syntheses of niobium trichalcogenides were carried out using high temperature ampoule method starting from high purity elements. Before synthesis the silica ampoule  $V=16$  mL was thoroughly cleaned, dried, heated in vacuum at  $800^{\circ}\text{C}$  to remove traces of absorbed  $\text{H}_2\text{O}$  and  $\text{O}_2$  and cooled under vacuum.

### Synthesis of $\text{NbS}_3$

The stoichiometric mixture of niobium powder (2.500 g, 0.0269 mol) and sulphur (2.590 g, 0.0809 mol) was loaded into ampoule which was evacuated to  $10^{-5}$  bar and sealed under dynamic vacuum. The ampoule was heated in electrical furnace as follows: heating to  $600^{\circ}\text{C}$  during 12 h, keeping at  $600^{\circ}\text{C}$  during 120 h, and cooling to room temperature for 5 h. Then the ampoule was cut and the resulting powder was taken out and put under Ar. Yield of  $\text{NbS}_3$  is quantitative. Powder pattern of  $\text{NbS}_3$  fits well that calculated for triclinic  $\text{NbS}_3$  (PDF Number: 71-468, triclinic, Sp. Gr. P-1).

### Synthesis of $\text{NbSe}_3$

The stoichiometric mixture of niobium powder (3.000 g, 0.0323 mol) and selenium powder (7.650 g, 0.0969 mol) were placed in a quartz vacuum-degassed ampoule and sealed. The ampoule with reaction mixture was heated in a furnace during 6 h to the temperature of  $600^{\circ}\text{C}$  and then kept at this temperature for 74 h. After that the furnace was cooled down to room temperature during 14 h and opened. Yield of  $\text{NbSe}_3$  is quantitative. XRD powder pattern of the synthesized  $\text{NbSe}_3$  corresponds to the pattern calculated for monoclinic  $\text{NbSe}_3$ .

## 2. Uv-vis characterization of dispersions

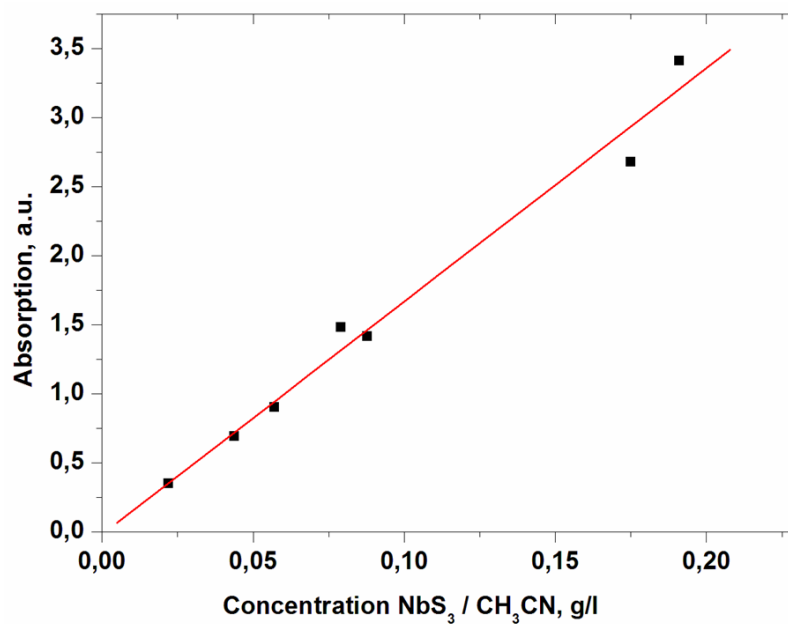

**Figure S1.** Correlation dependence between the concentration of NbS<sub>3</sub> / CH<sub>3</sub>CN dispersion and the value of absorption band at 589 nm.

### 3. DLS characterization of dispersions

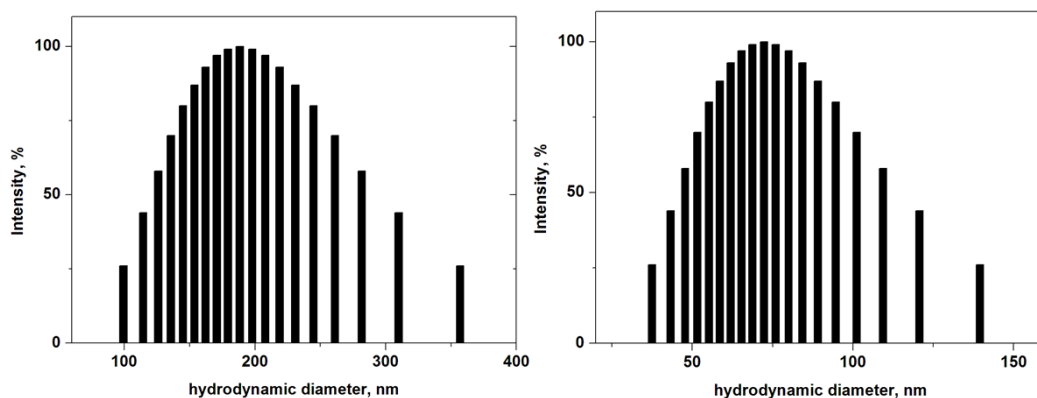

**Figure S2.** Monomodal DLS analysis of the hydrodynamic diameters distributions for NbS<sub>3</sub> colloidal dispersions in 45% EtOH water solution (left); in isopropanol (right).

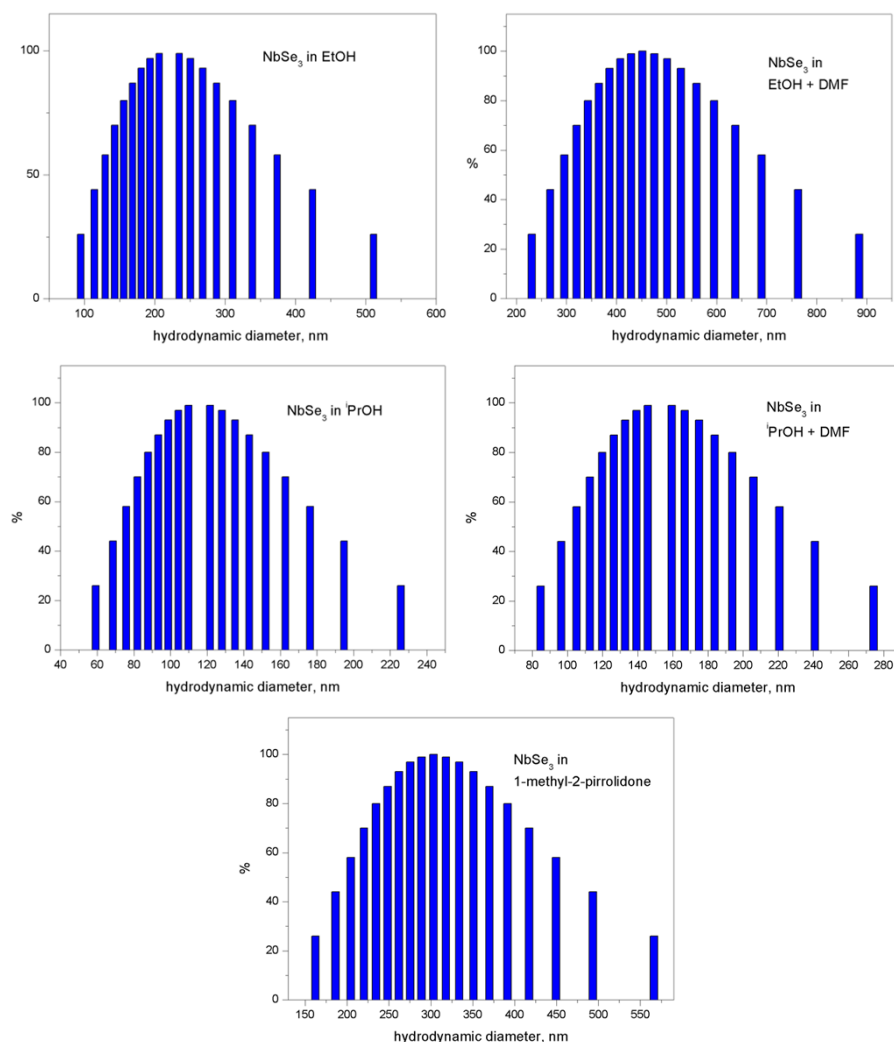

**Figure S3.** Monomodal DLS analysis of the hydrodynamic diameters distributions for NbSe<sub>3</sub> colloidal dispersion in various solvents

#### 4. SEM characterization of NbS<sub>3</sub> samples filtered through Anodisc membrane from its colloids

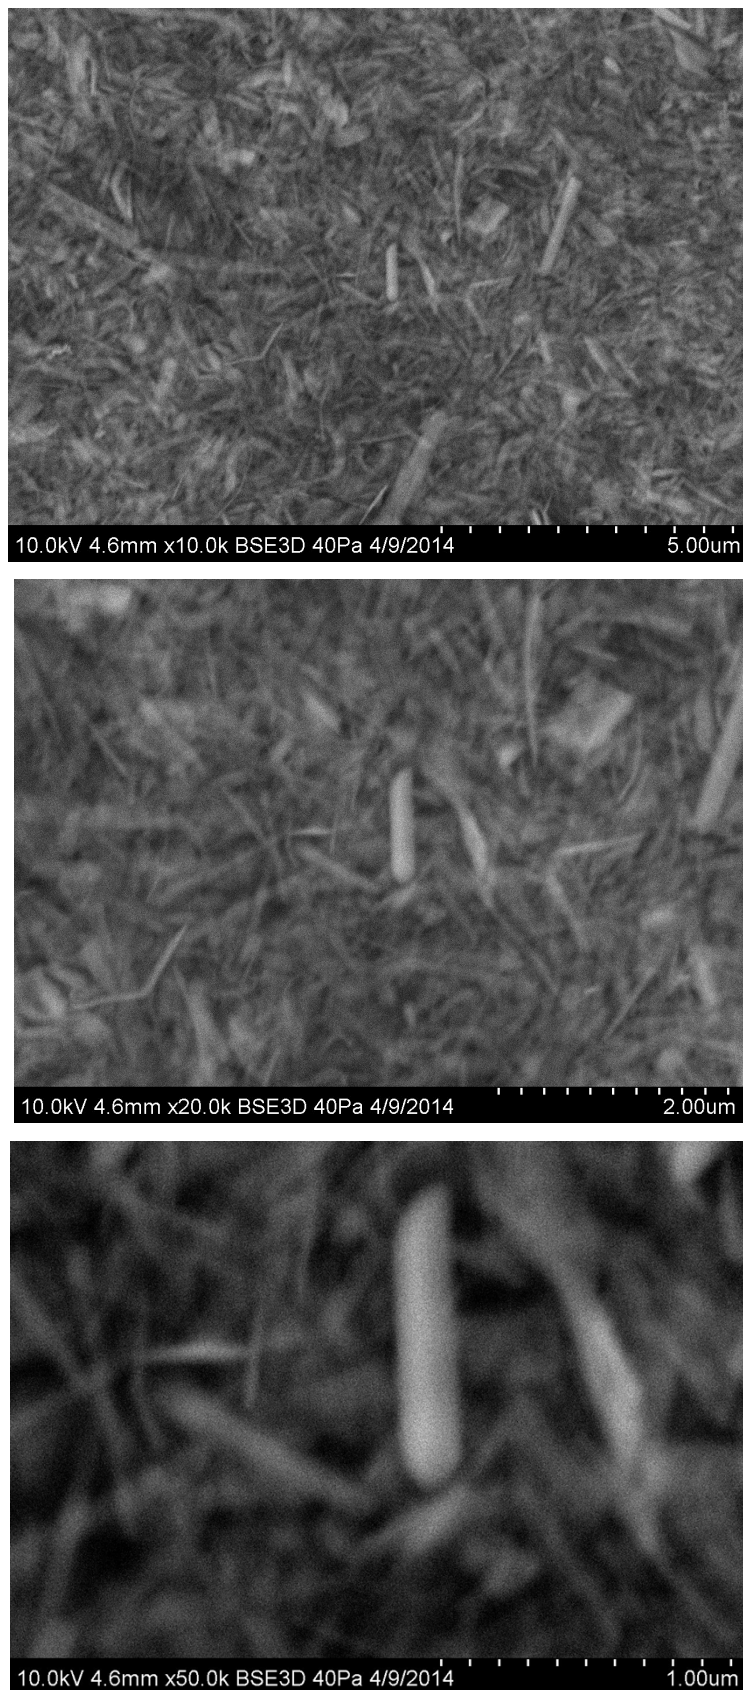

**Figure S4. SEM images of NbS<sub>3</sub> nanoparticles filtered from its colloid through Anodisc membrane.**

## 5. AFM characterization of NbS<sub>3</sub> and NbSe<sub>3</sub> samples deposited from acetonitrile dispersion

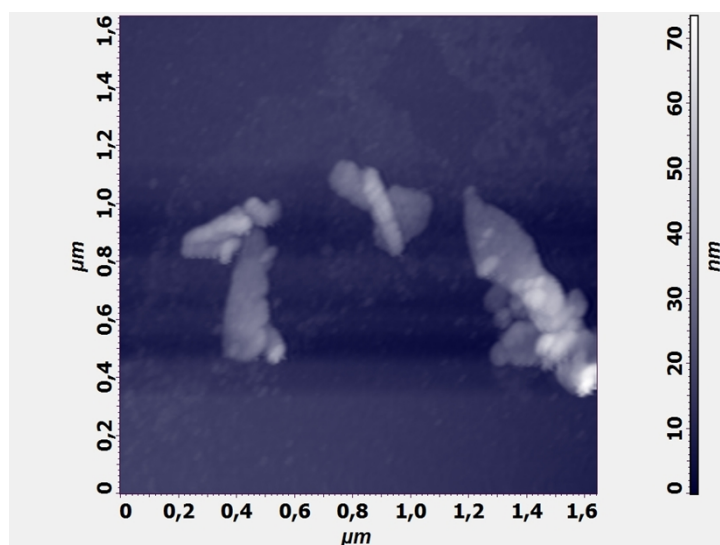

**Figure S5.** AFM image of NbSe<sub>3</sub> deposited from acetonitrile colloid solution.

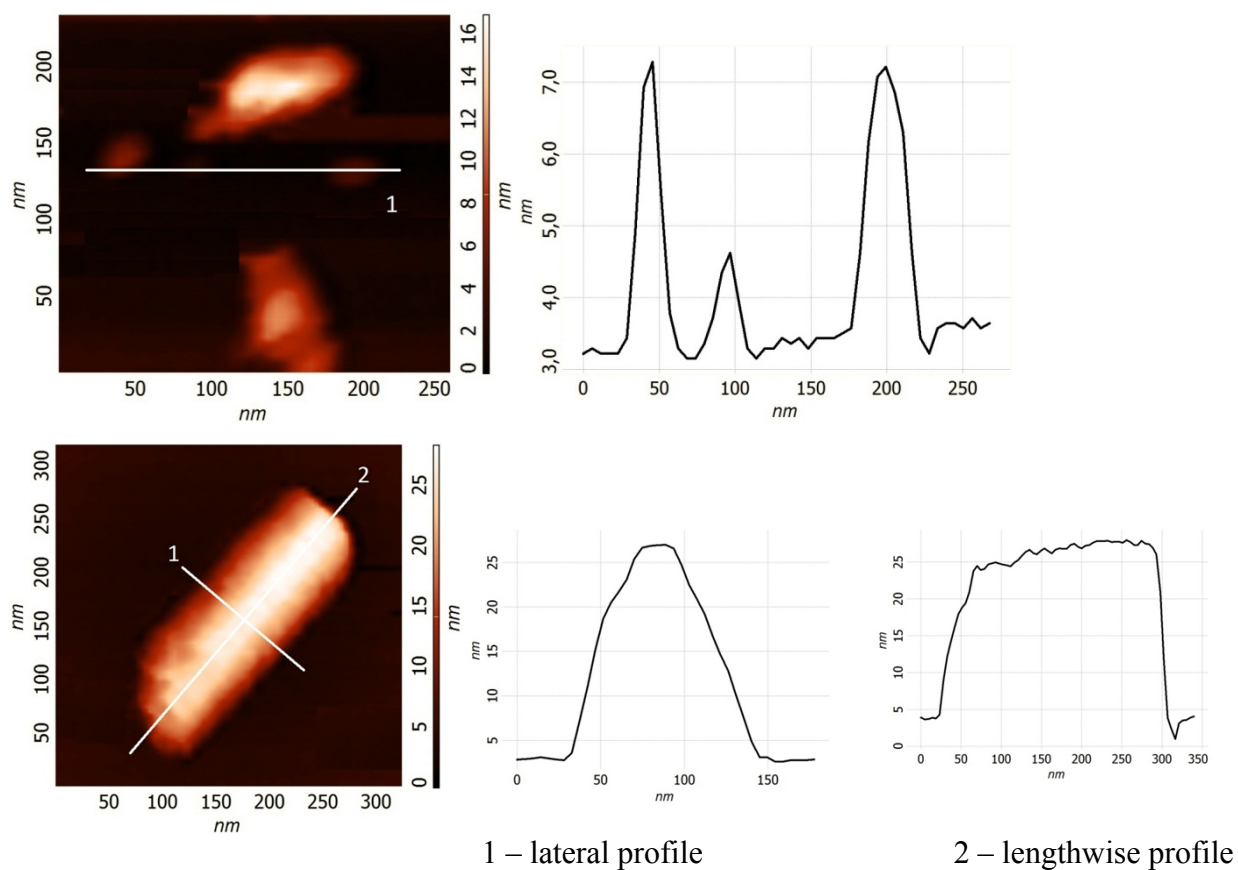

**Figure S6.** AFM images of small particles of NbS<sub>3</sub> in the sample and its profiles.

## 6. TEM characterization of NbS<sub>3</sub> samples deposited from acetonitrile dispersion

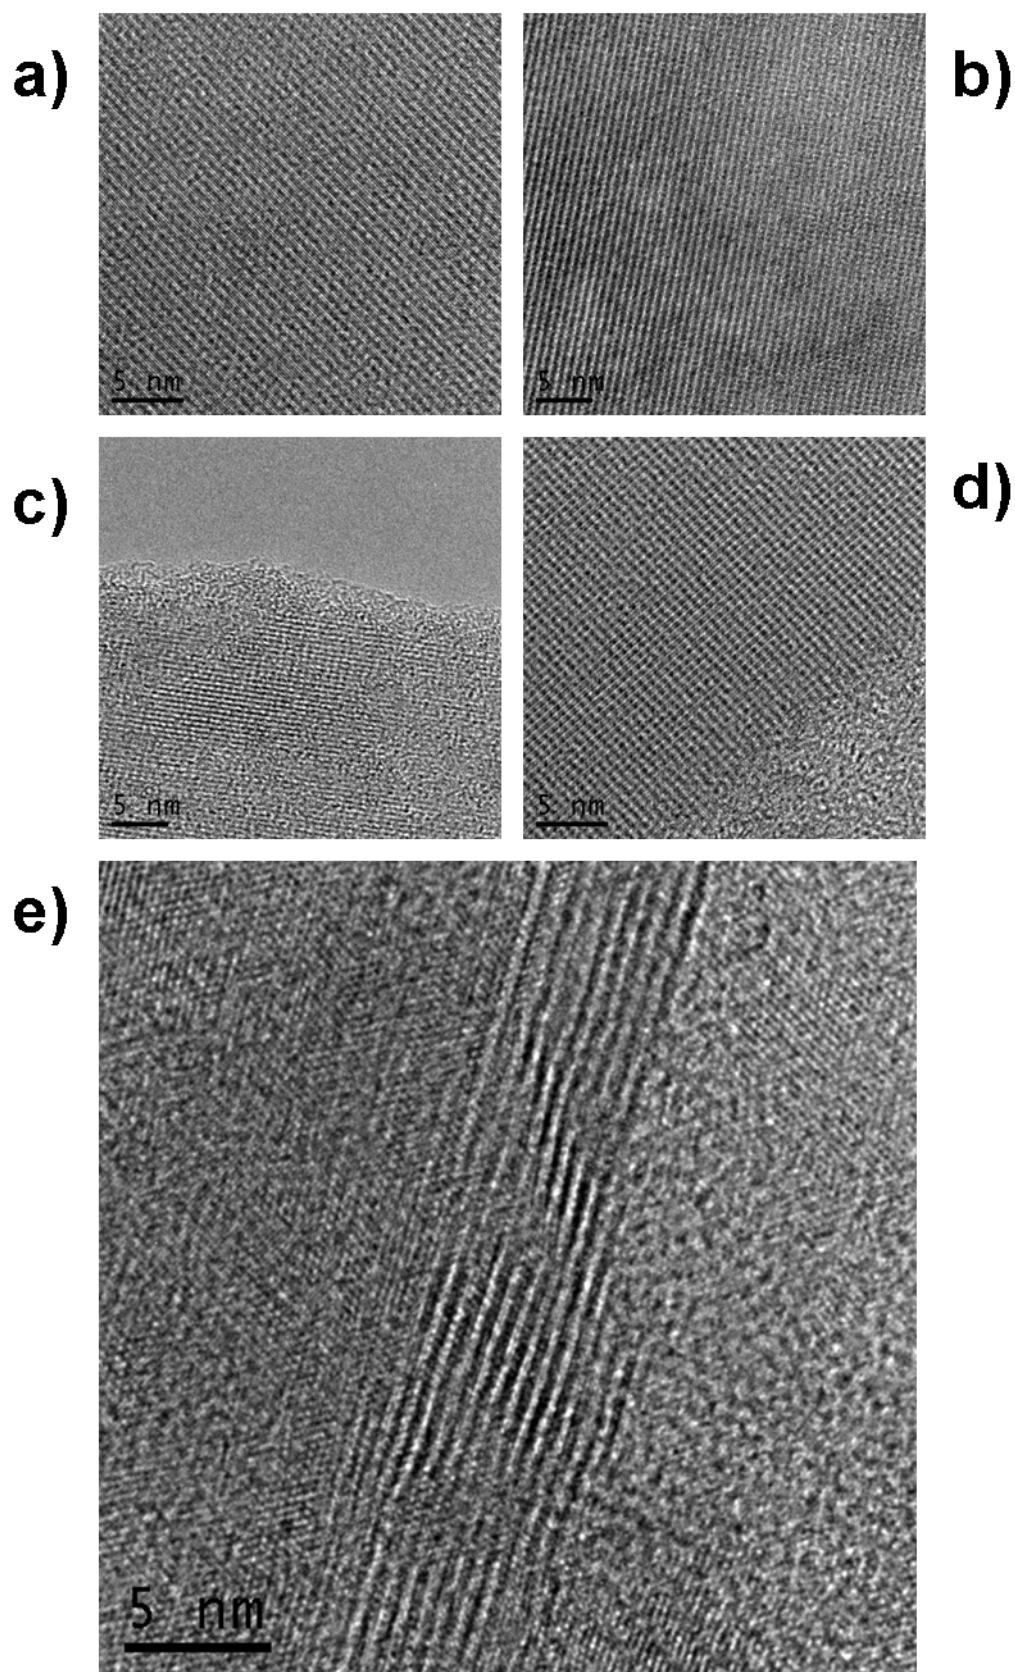

**Figure S7.** TEM images of NbS<sub>3</sub> high-crystalline NbS<sub>3</sub> particle (a, b); edges of NbS<sub>3</sub> particles (c, d); Figure c shows thin amorphous shell on the surface; NbS<sub>3</sub> layer packing (e).



## 7. Optical images of thin films of NbS<sub>3</sub> prepared by filtration and spray method

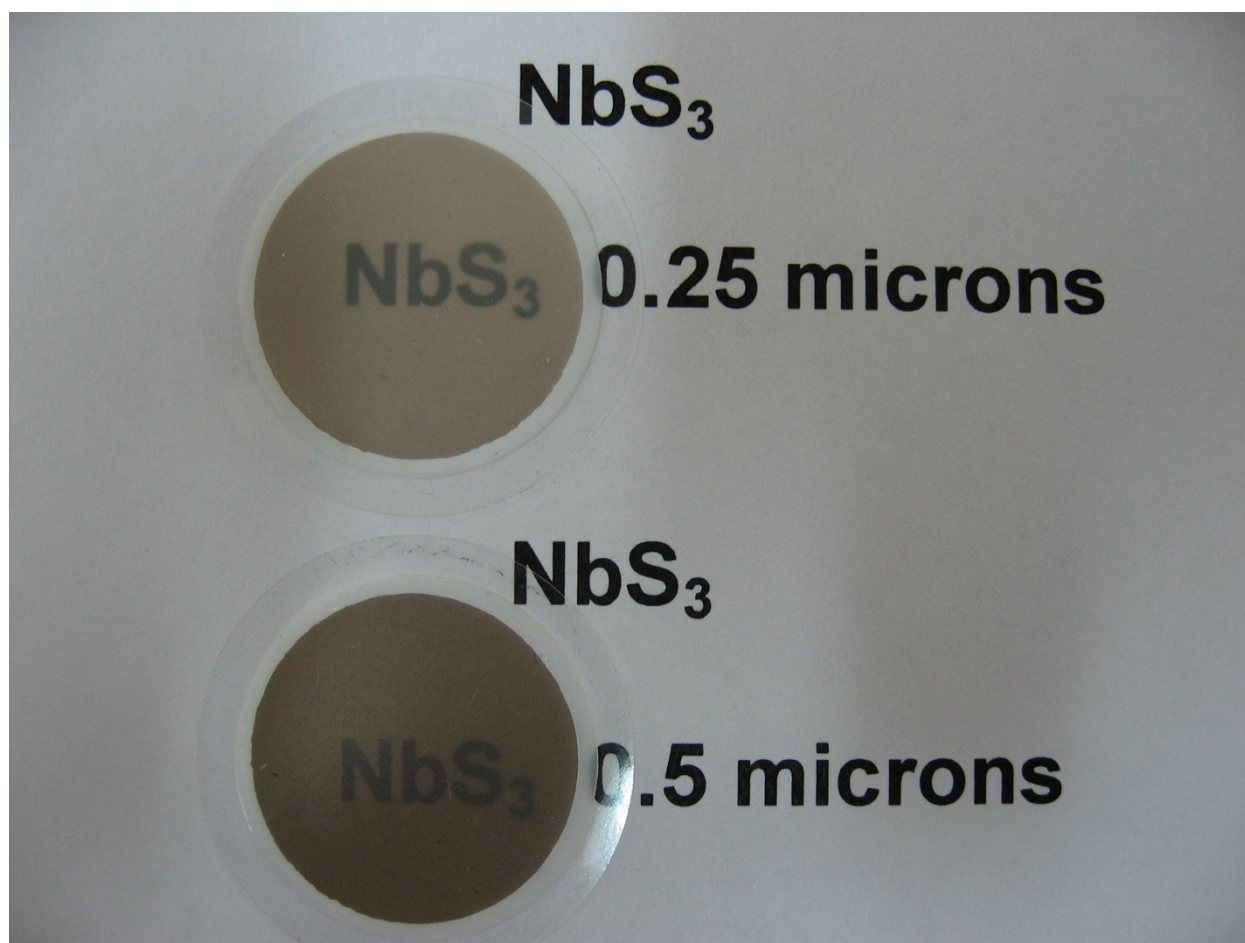

**Figure S8.** Photograph of NbS<sub>3</sub> films filtered on Whatman anodisc (diameter is 25 mm, pores are 0.02  $\mu\text{m}$ )

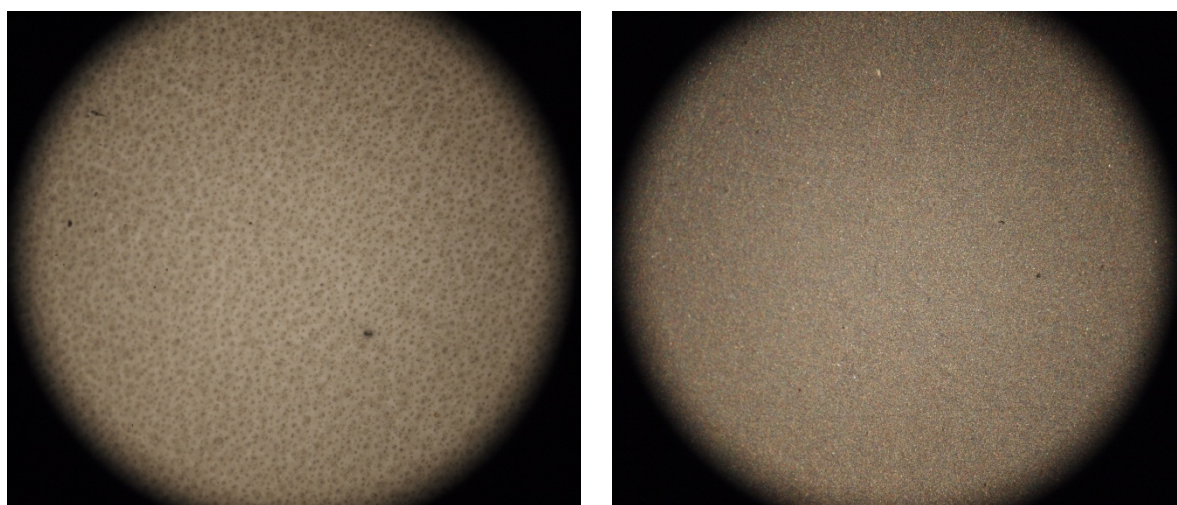

**Figure S9.** NbS<sub>3</sub> film preparation by spray-method: in process of spraying (left); the resulting NbS<sub>3</sub> film (right).



## 8. XRD characterization of NbS<sub>3</sub> films

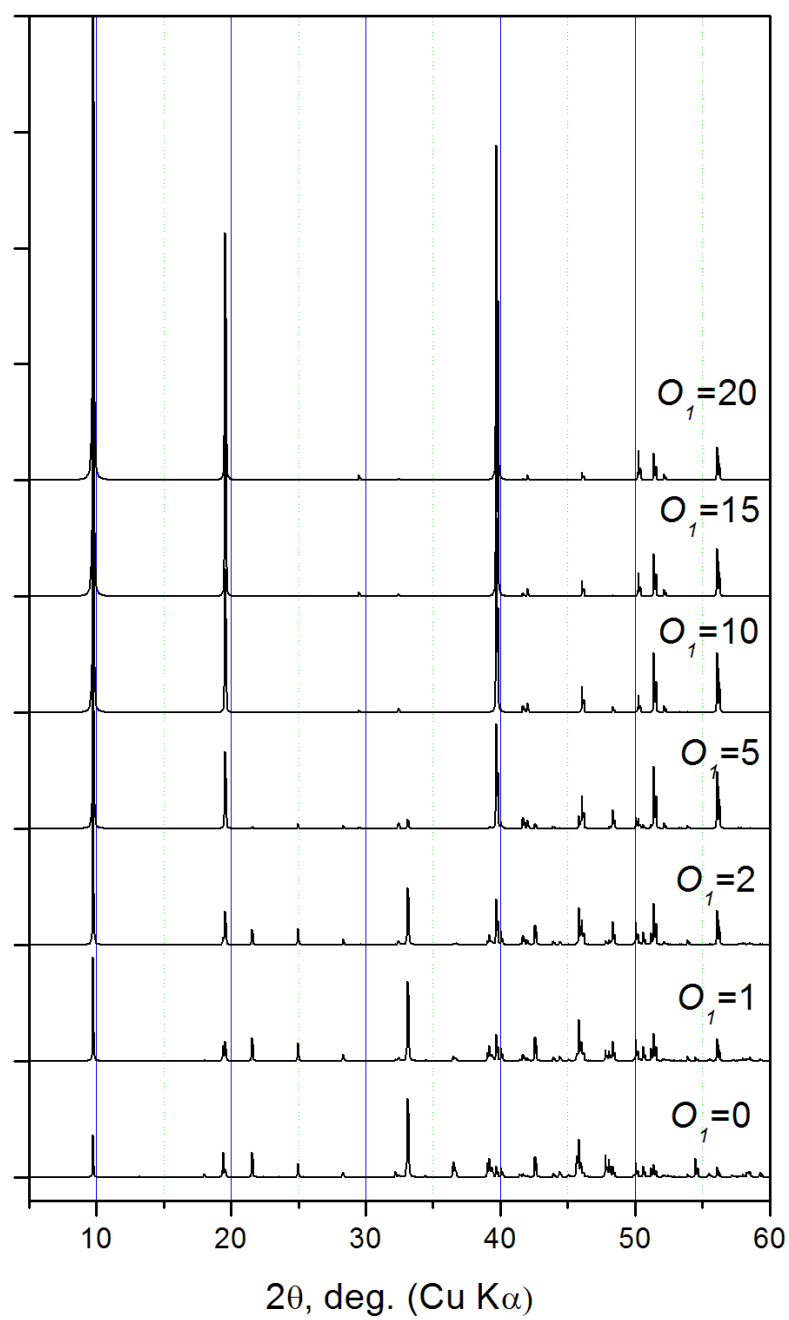

**Figure S10.** Simulation of textured X-Ray diffraction patterns for NbS<sub>3</sub> films with variation of empirical coefficient  $O_1$ .

## 9. IR spectroscopy data

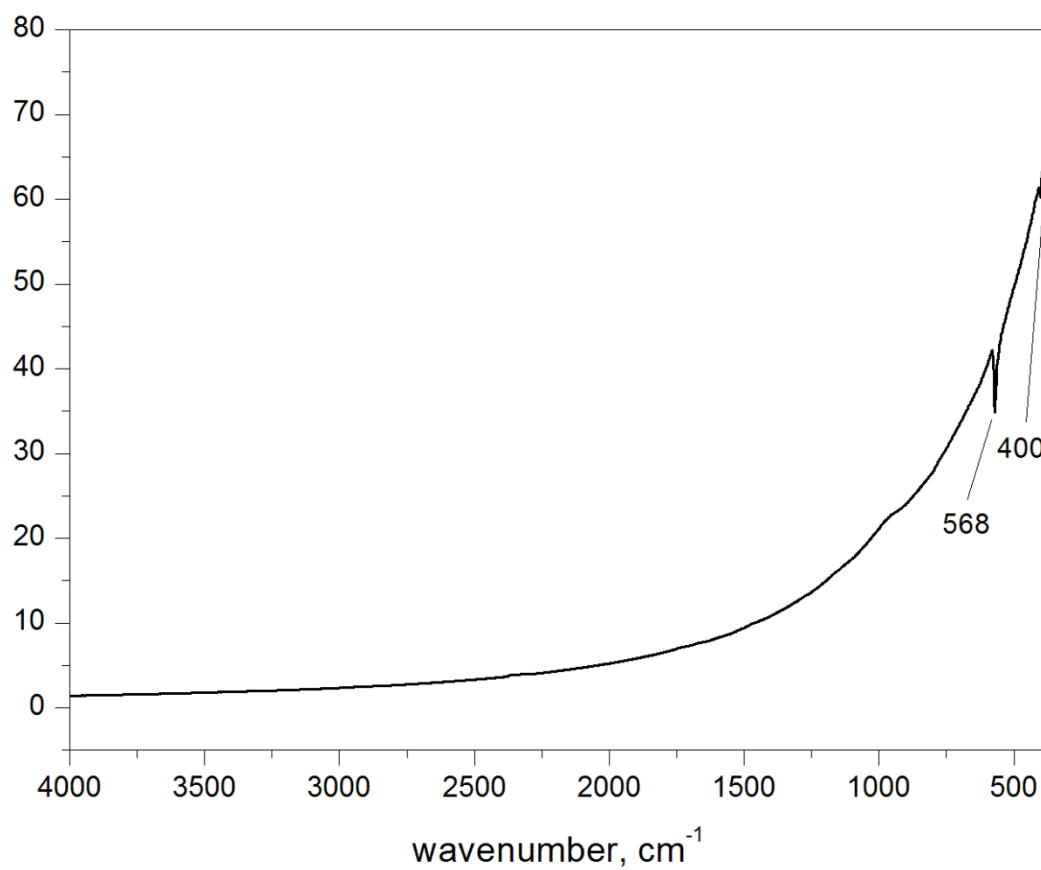

**Figure S11.** IR-spectrum of dispersed NbS<sub>3</sub> solid. The band at 568 cm<sup>-1</sup> corresponds to S–S bonds, and the band at 400 cm<sup>-1</sup> to Nb–S bonds.
